# Supplementary material for: Siglec1-expressing subcapsular sinus macrophages provide soil for melanoma lymph node metastasis
Source: eLife. 2019 Dec 24;8:e48916. doi: 10.7554/eLife.48916 (PMC6930078; doi:10.7554/eLife.48916)
Supplement: Figure 1—figure supplement 4—source data 1. [file elife-48916-fig1-figsupp4-data1.xlsx]

## Sheet: 2B
Melan-A	B16F10
0.8	13.59
1.05	15.49
1.14	14.57
			Column B	B16F10
			vs.	vs.
			Column A	Melan-A
			Unpaired t test
			P value	< 0.0001
			Significantly different? (P < 0.05)	Yes
			One- or two-tailed P value?	Two-tailed

## Sheet: 2D
Melan-A	B16F10
1.01	13.59
0.94	11.51
1.04	14.29
			Column B	B16F10
			vs.	vs.
			Column A	Melan-A
			Unpaired t test
			P value	0.0001
			Significantly different? (P < 0.05)	Yes
			One- or two-tailed P value?	Two-tailed
