# Supplementary material for: Siglec1-expressing subcapsular sinus macrophages provide soil for melanoma lymph node metastasis
Source: eLife. 2019 Dec 24;8:e48916. doi: 10.7554/eLife.48916 (PMC6930078; doi:10.7554/eLife.48916)
Supplement: Figure 1—figure supplement 5—source data 1. [file elife-48916-fig1-figsupp5-data1.xlsx]

## Sheet: 3B
Control	Sialidase
103.31	4.79
88.18	4.66
108.54	5.48
			Column B	Sialidase
			vs.	vs.
			Column A	Control
			Unpaired t test
			P value	< 0.0001
			Significantly different? (P < 0.05)	Yes
			One- or two-tailed P value?	Two-tailed

## Sheet: 3D
Control	Sialidase
92.13	2.04
101.98	3.31
105.87	4.37
			Column B	Sialidase
			vs.	vs.
			Column A	Control
			Unpaired t test
			P value	< 0.0001
			Significantly different? (P < 0.05)	Yes
			One- or two-tailed P value?	Two-tailed

## Sheet: 3F
Control	Sialidase
95.95	65.07
103.3	66.32
100.73	84.52
			Column B	Sialidase
			vs.	vs.
			Column A	Control
			Unpaired t test
			P value	0.0135
			Significantly different? (P < 0.05)	Yes
			One- or two-tailed P value?	Two-tailed
