# Supplementary material for: Siglec1-expressing subcapsular sinus macrophages provide soil for melanoma lymph node metastasis
Source: eLife. 2019 Dec 24;8:e48916. doi: 10.7554/eLife.48916 (PMC6930078; doi:10.7554/eLife.48916)
Supplement: Figure 1—source data 1. [file elife-48916-fig1-data1.xlsx]

## Sheet: Figure 1F
Mock	Siglec1
4	251
9	84
12	262
8	176
			Column B	Siglec1
			vs.	vs.
			Column A	Mock
			Unpaired t test
			P value	0.0041
			Significantly different? (P < 0.05)	Yes
			One- or two-tailed P value?	Two-tailed
