# Supplementary material for: Siglec1-expressing subcapsular sinus macrophages provide soil for melanoma lymph node metastasis
Source: eLife. 2019 Dec 24;8:e48916. doi: 10.7554/eLife.48916 (PMC6930078; doi:10.7554/eLife.48916)
Supplement: Figure 2—figure supplement 1—source data 1. [file elife-48916-fig2-figsupp1-data1.xlsx]

## Sheet: 1D
Adherent	Non-adhrent
84.4	50.1
76.55	48.65
			Column B	Non-adhrent
			vs.	vs.
			Column A	Adherent
			Unpaired t test
			P value	0.0161
			Significantly different? (P < 0.05)	Yes
			One- or two-tailed P value?	Two-tailed

## Sheet: 1F
Mock	Siglec1
59.4	54
56.75	55.85
			Column B	Siglec1
			vs.	vs.
			Column A	Mock
			Unpaired t test
			P value	0.1906
			Significantly different? (P < 0.05)	No
			One- or two-tailed P value?	Two-tailed
