# Supplementary material for: Siglec1-expressing subcapsular sinus macrophages provide soil for melanoma lymph node metastasis
Source: eLife. 2019 Dec 24;8:e48916. doi: 10.7554/eLife.48916 (PMC6930078; doi:10.7554/eLife.48916)
Supplement: Figure 2—figure supplement 2—source data 1. [file elife-48916-fig2-figsupp2-data1.xlsx]

## Sheet: 2C
Negative control Day 3	Negative control Day 4	Siglec1 siRNA-1 Day 3	Siglec1 siRNA-1 Day 4	Siglec1 siRNA-2 Day 3	Siglec1 siRNA-2 Day 4
114.13	92.9	39.41	25.16	41.73	44.26
91.68	103.18	35.72	34.77	36.67	33.51
94.21	97.77	34.14	34.46	40.15	41.1

## Sheet: 2F
Negative Control SiRNA	Siglec1 siRNA-1
82.1	57.2
76.7	58.7
74	49.2
80.8	65.2
			Column B	Siglec1 siRNA-1
			vs.	vs.
			Column A	Negative Control SiRNA
			Unpaired t test
			P value	0.0015
			Significantly different? (P < 0.05)	Yes
			One- or two-tailed P value?	Two-tailed

## Sheet: 2H
Negative Control SiRNA	Siglec1 siRNA-1
7.02	12.35
6.66	10.9
7.93	9.78
5.57	11.1
			Column B	Siglec1 siRNA-1
			vs.	vs.
			Column A	Negative Control SiRNA
			Unpaired t test
			P value	0.0011
			Significantly different? (P < 0.05)	Yes
			One- or two-tailed P value?	Two-tailed

## Sheet: 2J
Negative Control SiRNA	Siglec1 siRNA-1
1.083	0.599
0.923	0.692
1.171	0.588
0.822	0.646
			Column B	Siglec1 siRNA-1
			vs.	vs.
			Column A	Negative Control SiRNA
			Unpaired t test
			P value	0.0041
			Significantly different? (P < 0.05)	Yes
			One- or two-tailed P value?	Two-tailed

## Sheet: 2L
Negative Control SiRNA	Siglec1 siRNA-1
0.912	0.621
1.149	0.808
1.02	0.72
0.917	0.655
			Column B	Siglec1 siRNA-1
			vs.	vs.
			Column A	Negative Control SiRNA
			Unpaired t test
			P value	0.005
			Significantly different? (P < 0.05)	Yes
			One- or two-tailed P value?	Two-tailed
