# Supplementary material for: Siglec1-expressing subcapsular sinus macrophages provide soil for melanoma lymph node metastasis
Source: eLife. 2019 Dec 24;8:e48916. doi: 10.7554/eLife.48916 (PMC6930078; doi:10.7554/eLife.48916)
Supplement: Figure 2—source data 1. [file elife-48916-fig2-data1.xlsx]

## Sheet: Figure 2B
	Pioneer meta cells
	n=22 single cells
	Cleaved caspase-3-positive cells=8
	Cleaved caspase-3-positive cells %=36.36%
	Cleaved caspase-3-negative cells %=63.63%
	Meta foci
	n=41 cells in total 12 foci
	Cleaved caspase-3-positive cells=5
	Cleaved caspase-3-positive cells %=12.19%
	Cleaved caspase-3-negative cells %=87.80%

## Sheet: Figure 2D
	Pioneer meta cells
	n=18 single cells
	Ki67-positive cells=3
	Ki67-positive cells %= 16.66%
	Ki67-negative cells %= 83.33%
	Meta foci
	n=34 cells in 11 foci
	Ki67-positive cells=26
	Ki67-positive cells %= 76.47%
	Ki67-negative cells %= 23.52%

## Sheet: Figure 2G
Mock	Siglec
64.75	85.6
61.6	93.8
58.1	80.3
55.3	78.6
			Column B	Siglec
			vs.	vs.
			Column A	Mock
			Unpaired t test
			P value	0.0008
			Significantly different? (P < 0.05)	Yes
			One- or two-tailed P value?	Two-tailed

## Sheet: Figure 2I
Mock	Siglec
10.55	3.91
9.58	3.18
9.84	4.71
10.29	5.31
			Column B	Siglec
			vs.	vs.
			Column A	Mock
			Unpaired t test
			P value	<0.0001
			Significantly different? (P < 0.05)	Yes
			One- or two-tailed P value?	Two-tailed

## Sheet: Figure 2K
Mock	Siglec
0.95	2.04
0.87	2.43
1.17	2.23
			Column B	Siglec
			vs.	vs.
			Column A	Mock
			Unpaired t test
			P value	0.001
			Significantly different? (P < 0.05)	Yes
			One- or two-tailed P value?	Two-tailed

## Sheet: Figure 2M
Mock	Siglec
0.94	1.63
0.92	1.25
1.12	1.84
			Column B	Siglec
			vs.	vs.
			Column A	Mock
			Unpaired t test
			P value	0.0344
			Significantly different? (P < 0.05)	Yes
			One- or two-tailed P value?	Two-tailed
