# Supplementary material for: Siglec1-expressing subcapsular sinus macrophages provide soil for melanoma lymph node metastasis
Source: eLife. 2019 Dec 24;8:e48916. doi: 10.7554/eLife.48916 (PMC6930078; doi:10.7554/eLife.48916)
Supplement: Figure 3—source data 1. [file elife-48916-fig3-data1.xlsx]

## Sheet: Sheet1
Gene_ID	Transcript_ID	Gene_Symbol	Experimental/Mock.fc
69221	NR_030738	2410006H16Rik	-1.68278
17122	NM_010753	Mxd4	-1.87705
100861531	NR_046233	.	-1.77977
68028	NM_026517	Rpl22l1	-1.59773
13198	NM_007837,NM_001290183	Ddit3	-1.87064
11676	NM_009657,NM_001303423	Aldoc	-1.67482
20893	NM_011498	Bhlhe40	-1.5135
17988	NM_008681	Ndrg1	-1.71051
54683	NM_012021	Prdx5	-1.51788
69754	NM_153195	Fbxo7	-1.57049
74747	NM_029083	Ddit4	-2.12272
66961	NR_003513	Neat1	-2.1575
69253	NM_024441,NM_001164708	Hspb2	-1.50263
27981	NM_023665	D4Wsu53e	-1.60313
22339	NM_001025257,NM_001287057,NM_001025250,NM_001287058,NM_001110268,NM_001110267,NM_001110266,NM_009505,NM_001287056	Vegfa	-1.81969
13682	NM_001123038,NM_013506,NM_001123037,NR_110335	Eif4a2	-1.91568
68949	NM_001081005	1500012F01Rik	-1.73452
381822	NR_037956,NR_037955	1190002F15Rik	-1.77517
18451	NM_011030	P4ha1	-1.53788
68563	NM_026767	Dpm3	-1.53396
12576	NM_009875	Cdkn1b	-1.67559
20130	NM_009101	Rras	-1.94417
19411	NM_011244,NM_001042727	Rarg	-1.54889
353502	NM_181821	Hcfc1r1	-1.60911
223775	NM_145478	Pim3	-1.65445
55942	NM_018820	Sertad1	-1.74374
68957	NM_198410	Paqr6	-1.52843
319162	NM_178218	Hist3h2a	-2.21277
27361	NM_013759	Msrb1	-1.51312
16362	NM_001159396,NM_001159393,NM_008390	Irf1	-1.77164
20148	NM_011303,NM_001172424	Dhrs3	-1.60114
50708	NM_015786	Hist1h1c	-1.93137
14794	NM_013539	Spsb2	-1.54279
12452	NM_007635	Ccng2	-1.53601
654824	NM_001039562	Ankrd37	-1.74389
54194	NM_017476	Akap8l	-1.5841
66612	NM_025661	Ormdl3	-1.57826
20196	NM_009113	S100a13	-1.55999
21859	NM_011595	Timp3	-1.88808
56706	NM_019937	Ccnl1	-1.56373
237928	NM_153104	Phospho1	-1.54194
21418	NM_001122948,NM_001301674,NM_011547	Tfap2a	-1.50632
13170	NM_016974	Dbp	-1.74689
56036	NM_207678	Ccnl2	-1.54042
17872	NM_008654	Ppp1r15a	-1.65218
69745	NM_027196	Pold4	-1.50744
16477	NM_008416	Junb	-1.772
69837	NM_197992	Pcgf1	-1.50385
51793	NM_001190449,NM_016765	Ddah2	-1.64041
22695	NM_011756	Zfp36	-2.22875
56017	NM_019488	Slc2a8	-1.50285
22117	NM_009437	Tst	-1.58901
30951	NM_013926	Cbx8	-1.64488
18035	NM_010907	Nfkbia	-1.80861
69749	NR_038152,NR_038151	2410004N09Rik	-1.83767
66293	NR_027819,NR_027821,NR_027820	1810032O08Rik	-1.72507
21847	NM_013692,NM_001289471	Klf10	-1.87141
16007	NM_010516	Cyr61	-2.3124
100039864	NR_029468	Snhg12	-1.65589
30957	NM_001163450,NM_001163451,NM_013931,NM_001163453,NM_001163447,NM_001163449,NM_001163448	Mapk8ip3	-1.84499
18626	NM_001159367,NM_011065	Per1	-2.14345
232798	NM_172736	Leng8	-1.53001
18030	NM_017373	Nfil3	-2.07405
13197	NM_007836	Gadd45a	-1.72697
76933	NM_029803,NM_001281830	Ifi27l2a	-1.51496
27356	NM_013754	Insl6	-1.5203
319181	NM_178196	Hist1h2bg	-1.55864
19734	NM_011267	Rgs16	-1.97264
18830	NM_011125	Pltp	-1.58755
14910	NR_027009,NR_027008,NR_027010	Gt(ROSA)26Sor	-1.65133
105171	NM_001042591	Arrdc3	-1.60702
170770	NM_133234	Bbc3	-2.01171
17937	NM_001122895,NM_008668	Nab2	-1.56394
237400	NM_198615	Mex3d	-1.68434
170742	NM_133210	Sertad3	-1.541
213027	NM_001039578	Evi5l	-1.58856
23882	NM_011817	Gadd45g	-1.80518
67797	NM_026382	Snrnp48	-1.69406
12297	NM_001044741,NM_007581,NM_001286226	Cacnb3	-1.58938
67287	NM_001205239,NR_038074,NR_038075,NM_029922	Parp6	-1.60441
276829	NM_177776	Smtnl2	-1.50825
320299	NM_177128	Iqcb1	-1.50765
17873	NM_008655	Gadd45b	-2.53379
73951	NR_045614	4930413G21Rik	-1.69831
243300	NM_175521	Nyap1	-1.671
76491	NM_029631	Abhd14b	-1.66587
66985	NM_025886	Rassf7	-2.25994
72938	NM_028394	Hspb11	-1.58766
215418	NM_153287	Csrnp1	-1.60815
19252	NM_013642	Dusp1	-1.57964
12226	NM_007569	Btg1	-1.51764
15507	NM_013560	Hspb1	-1.73928
12032	NM_007529,NM_001109758	Bcan	-2.01116
414085	NR_033222	9330151L19Rik	-2.13281
68039	NM_001291280,NM_026523	Nmb	-1.72897
56506	NM_019686	Cib2	-1.76399
52377	NM_026555	Rcn3	-1.75887
217166	NM_145434	Nr1d1	-1.80703
11910	NM_007498	Atf3	-1.59277
12931	NM_018827	Crlf1	-1.5815
319158	NM_175656	Hist1h4i	-1.66367
83554	NM_031380	Fstl3	-2.16148
14802	NM_001113181,NM_019691,NM_001113180	Gria4	-1.50022
68490	NM_026741	Zfp579	-1.57426
212980	NM_145977,NM_001177628	Slc45a3	-1.52794
73106	NM_001042710	Prss57	-2.33416
15267	NM_013549	Hist2h2aa1	-2.00424
70807	NM_027560	Arrdc2	-1.50994
66395	NM_001039959,NR_104460,NM_009643,NM_001286518	Ahnak	-1.66659
66456	NR_033780	2810001G20Rik	-1.50457
77864	NM_001005341	Ypel2	-1.66376
68128	NR_015601	Fam120aos	-1.95823
56464	NM_019861	Ctsf	-1.52491
269630	NR_040469	5031425E22Rik	-1.5348
69434	NR_003145	Snhg10	-1.57924
319190	NM_178214	Hist2h2be	-1.64448
12702	NM_007707	Socs3	-1.59264
14184	NM_001163216,NM_001163217,NM_001163215,NM_008010,NM_001205270	Fgfr3	-2.19572
107971	NM_144939	Frs3	-1.54821
18712	NM_008842	Pim1	-1.79752
231207	NM_001177379,NM_175937	Cpeb2	-1.72019
72091	NR_024068	Snhg7	-1.70437
80859	NM_001159394,NM_001159395,NM_030612	Nfkbiz	-1.73622
15016	NR_051981	H2-Q5	-2.87108
72575	NR_038184,NR_038185	C430049B03Rik	-2.63777
14226	NM_016863	Fkbp1b	-1.67186
66412	NM_001042592,NM_025549	Arrdc4	-1.88429
11481	NM_007397	Acvr2b	-1.50721
20568	NM_011414	Slpi	-1.62219
84653	NM_033041	Hes7	-2.29624
17691	NM_010831	Sik1	-1.63367
100042332	NR_030682	2810410L24Rik	-1.89926
57738	NM_021301,NM_001145899	Slc15a2	-1.52478
72500	NM_030244	Ier5l	-2.51318
18952	NM_001284398,NM_011129,NM_001284392,NM_001284394	Sept4	-1.5864
18604	NM_133667	Pdk2	-1.74069
27047	NM_012050	Omd	-1.55801
17385	NM_008606	Mmp11	-1.70387
69066	NM_001163473	1810010H24Rik	-1.51895
13636	NM_010107,NM_001162425	Efna1	-1.67665
18227	NM_013613,NM_001139509	Nr4a2	-1.82743
15205	NM_008235	Hes1	-1.55215
407790	NM_001098789	Ndufa4l2	-1.72656
320116	NM_177075	Fndc9	-1.60669
53627	NM_145908,NM_023638,NM_016913,NM_145907	Porcn	-1.65773
78108	NR_046011	4930414L22Rik	-1.74267
73204	NR_045056,NR_045055	3110056K07Rik	-1.56105
16880	NM_001113386,NM_013584	Lifr	-1.56234
432855	NR_004444	Zfhx2os	-1.68625
613254	NR_028363	AA465934	-1.67224
17131	NM_001042660	Smad7	-1.83348
76100	NR_073359	5830454E08Rik	-1.63001
69170	NR_037569	1810026B05Rik	-1.71604
626055	NR_033578	Gm15645	-1.52993
14871	NM_008185	Gstt1	-1.54222
84094	NM_032398	Plvap	-1.50225
100504486	NR_045032	Gdap10	-1.69311
11604	NM_007427,NM_001271806	Agrp	-1.54855
71004	NR_027955	4931440P22Rik	-1.87832
14957	NM_145713	Hist1h1d	-1.55092
52829	NM_026821	Lurap1l	-1.66771
68939	NM_026878	Rasl11b	-1.51312
100038460	NR_046048	Gm10677	-1.70972
232685	NR_110471,NR_110470,NR_110469	.	-1.80459
382522	NM_206882	Hist3h2bb-ps	-1.53735
100306943	NR_028576	Scarna13	-1.55185
100504601	NR_045795	Gm16702	-1.81697
319154	NM_178215	Hist2h3b	-1.58537
78547	NR_033567	E130304I02Rik	-1.63102
100526796	NR_037588	B930003M22Rik	-2.12205
103729	NR_028364	AI450353	-1.54433
19039	NM_011150	Lgals3bp	1.5079
71898	NM_001168660,NM_173743	Apol9b	1.55435
223672	NM_001162883,NM_173786	Apol9a	1.50187
227613	NM_146116	Tubb4b	1.69407
233908	NM_139149	Fus	1.5698
15944	NM_008326	Irgm1	1.54622
19385	NM_011239	Ranbp1	1.60703
76936	NM_001109913,NM_029804	Hnrnpm	1.64942
15957	NM_008331	Ifit1	1.64489
17216	NM_008564	Mcm2	1.55256
21877	NM_009387,NM_001271729	Tk1	1.55693
13860	NM_001271595,NM_001271587,NM_001271588,NM_001271589,NM_007945	Eps8	1.78373
71514	NM_023603,NR_045010	Sfpq	1.56324
67134	NM_024193	Nop56	1.64467
22169	NM_020557	Cmpk2	1.55131
17215	NM_008563	Mcm3	1.53072
13211	NM_007842	Dhx9	1.56439
18817	NM_011121	Plk1	1.65664
268697	NM_172301	Ccnb1	1.59146
54396	NM_019440	Irgm2	1.60285
214669	NM_145993,NM_001289711,NM_001289712,NR_110362	L3mbtl2	1.54727
12428	NM_009828	Ccna2	1.54533
230753	NM_146153	Thrap3	1.57753
209086	NM_010156	Samd9l	1.59882
21781	NM_001291766,NM_001291765,NM_009361,NM_001291768	Tfdp1	1.57159
110109	NM_138747	Nop2	1.62548
56095	NM_025310	Ftsj3	1.53046
14450	NM_010256	Gart	1.54772
109212	NM_144526	Fam64a	1.51623
17345	NM_001081117	Mki67	1.65345
70769	NM_001039353,NM_001039352,NM_001039351,NM_053086	Nolc1	1.71857
445007	NM_001002929	Nup85	1.53556
625054	NR_003363	Gm6548	1.55685
14156	NM_001271614,NM_001271615,NM_007999	Fen1	1.56615
14235	NM_008021	Foxm1	1.6405
29870	NM_013882,NM_001168672	Gtse1	1.64935
547253	NM_001039530	Parp14	1.53436
12443	NM_007631	Ccnd1	1.90971
73804	NM_001290662,NM_134471	Kif2c	1.56751
20810	NM_009272	Srm	1.6474
230935	NM_172704	Dnajc11	1.55323
235036	NM_145610	Ppan	1.54206
74148	NM_001081158	Cluh	1.54964
70024	NM_027290	Mcm10	1.52471
214604	NM_172534	4932411E22Rik	1.52336
52040	NM_001163818	Ppp1r10	1.50914
17427	NM_008613	Mns1	1.60948
330474	NM_198631	Zc3h4	1.57569
13361	NM_010049	Dhfr	3.74658
68048	NM_001162939,NM_026531	Aen	1.63116
237886	NM_172796	Slfn9	1.78702
70218	NM_197959	Kif18b	1.52656
381810	NM_001163269,NM_001163268	Lpar5	1.68074
276919	NM_177367	Gemin4	1.74251
12449	NM_007634	Ccnf	1.5611
240087	NM_001010833	Mdc1	1.55493
66614	NM_001110809,NM_025663,NM_001286857	Gpatch4	1.62934
234549	NM_172757	Heatr3	1.50221
240641	NM_183046	Kif20b	1.5671
20425	NM_009171	Shmt1	1.58288
211949	NM_145134	Spsb4	1.57484
12316	NM_009791	Aspm	1.68212
101831	NM_178643	C230052I12Rik	1.53049
108000	NM_001081363	Cenpf	1.52779
276950	NM_181545,NM_001167743	Slfn8	1.51508
20612	NM_011426	Siglec1	53.0812
107094	NM_199447	Rrp12	1.51032
209334	NM_177331	Gen1	1.65878
26909	NM_012012	Exo1	1.508
76464	NM_029617	Casc5	1.51047
