# Supplementary material for: Siglec1-expressing subcapsular sinus macrophages provide soil for melanoma lymph node metastasis
Source: eLife. 2019 Dec 24;8:e48916. doi: 10.7554/eLife.48916 (PMC6930078; doi:10.7554/eLife.48916)
Supplement: Figure 4—source data 1. [file elife-48916-fig4-data1.xlsx]

## Sheet: Figure 4B
PT	LN meta
1.108	2.48
1.023	1.468
1.051	2.945
0.817	2.784
1.388	1.51
1.343	1.172
0.542	1.905
0.724	1.829
1.185	1.446
1.087	0.787
0.91	1.037
0.816	1.845		Column B	LN meta
			vs.	vs.
			Column A	PT
			Unpaired t test
			P value	0.0013
			Significantly different? (P < 0.05)	Yes
			One- or two-tailed P value?	Two-tailed

## Sheet: Figure 4D
Mock	Siglec1
23.7	83.1
33.8	75.7
26.3	78
58.5	86.9
			Column B	Siglec1
			vs.	vs.
			Column A	Mock
			Unpaired t test
			P value	0.0016
			Significantly different? (P < 0.05)	Yes
			One- or two-tailed P value?	Two-tailed

## Sheet: Figure 4G
Negative control siRNA	Siglec1 siRNA
74.3	32.1
78.25	37.15
71.5	40.65
75.3	27.3		Column B	Siglec1 siRNA
			vs.	vs.
			Column A	Negative control siRNA
			Unpaired t test
			P value	< 0.0001
			Significantly different? (P < 0.05)	Yes
			One- or two-tailed P value?	Two-tailed
