# Supplementary material for: Siglec1-expressing subcapsular sinus macrophages provide soil for melanoma lymph node metastasis
Source: eLife. 2019 Dec 24;8:e48916. doi: 10.7554/eLife.48916 (PMC6930078; doi:10.7554/eLife.48916)
Supplement: Figure 5—figure supplement 1—source data 1. [file elife-48916-fig5-figsupp1-data1.xlsx]

## Sheet: 1D
WT	KO
103.29	86.57
102.64	82.19
94	68.74
			Column B	KO
			vs.	vs.
			Column A	WT
			Unpaired t test
			P value	0.0276
			Significantly different? (P < 0.05)	Yes
			One- or two-tailed P value?	Two-tailed

## Sheet: 1F
WT	KO
96.56	21.6
105	27.93
98.43	33.56
			Column B	KO
			vs.	vs.
			Column A	WT
			Unpaired t test
			P value	< 0.0001
			Significantly different? (P < 0.05)	Yes
			One- or two-tailed P value?	Two-tailed

## Sheet: 1G
Day	KO		WT
0	1	1	1	1
1	1.26	1.23	1.22	1.059
2	4.96	3.88	3.43	4.35
3	14.74	14.53	13.92	13.155
4	27.76	29.32	26.48	29.07
				(x105) cell number

## Sheet: 1H
WT	KO
0.194	0.179
0.168	0.208
0.203	0.188
			Column B	KO
			vs.	vs.
			Column A	WT
			Unpaired t test
			P value	0.8178
			Significantly different? (P < 0.05)	No
			One- or two-tailed P value?	Two-tailed

## Sheet: 1J
WT (no FBS)	WT (with FBS)	KO (no FBS)	KO (with FBS)
0.76	34.4	0.176	32.736
0.858	27.45	0.792	24.66
0.448	23.76	0.312	22.08
					Column D	KO (with FBS)
					vs.	vs.
					Column B	WT (with FBS)
					Unpaired t test
					P value	0.6715
					Significantly different? (P < 0.05)	No
					One- or two-tailed P value?	Two-tailed

## Sheet: 1K
WT	KO
118.45	151.48
125.48	109.51
96.67	145.13
104.74	91.6
128.86	133.66
109.46	107.65
124.47	135.05
139.14	117.6		Column B	KO
			vs.	vs.
			Column A	WT
			Unpaired t test
			P value	0.5389
			Significantly different? (P < 0.05)	No
			One- or two-tailed P value?	Two-tailed
