# Supplementary material for: Siglec1-expressing subcapsular sinus macrophages provide soil for melanoma lymph node metastasis
Source: eLife. 2019 Dec 24;8:e48916. doi: 10.7554/eLife.48916 (PMC6930078; doi:10.7554/eLife.48916)
Supplement: Figure 5—source data 1. [file elife-48916-fig5-data1.xlsx]

## Sheet: Figure 5B
WT	KO
384	49
362	59
231	21
153.5	24.33
			Column B	KO
			vs.	vs.
			Column A	WT
			Unpaired t test
			P value	0.0046
			Significantly different? (P < 0.05)	Yes
			One- or two-tailed P value?	Two-tailed

## Sheet: Figure 5E
WT	KO
7990.4	181.54
10892.8	1332.36
9180.48	32.76
5203.28	444.84
2855.25	507.36
10089.8	236.6
8649.6	635.16
5707.98	154.88		Column B	KO
			vs.	vs.
			Column A	WT
			Unpaired t test
			P value	< 0.0001
			Significantly different? (P < 0.05)	Yes
			One- or two-tailed P value?	Two-tailed

## Sheet: Figure 5H
WT	KO
72.72	66.6
83.33	0
80	0
80	0
60	25
88.88	50
28.57	22.22
66.66	60
76.92
57.14				Column B	Del
				vs.	vs.
				Column A	WT
				Unpaired t test
				P value	0.0014
				Significantly different? (P < 0.05)	Yes
				One- or two-tailed P value?	Two-tailed

## Sheet: Figure 5J
WT	KO
9.09	66.66
11.11	66.66
0	0
0	33.33
7.69	40
16.66	20
0	25
20	50		Column B	KO
	57.14		vs.	vs.
	0		Column A	WT
	40
			Unpaired t test
			P value	0.0048
			Significantly different? (P < 0.05)	Yes
			One- or two-tailed P value?	Two-tailed
